# Supplementary material for: Gold(i) halide complexes of bis(diphenylphosphine)diphenyl ether ligands: a balance of ligand strain and non-covalent interactions
Source: Royal Society of Chemistry journal article supplement (doi:10.1039/b920717a), 2010-01-01

# SUPPORTING INFORMATION

Partyka, Updegraff, Zeller, Hunter,  
and Gray

**Figure S1.** Thermal Ellipsoid Projection of **7** (50% probability).  
Unlabeled atoms are carbon; H atoms are omitted for clarity.

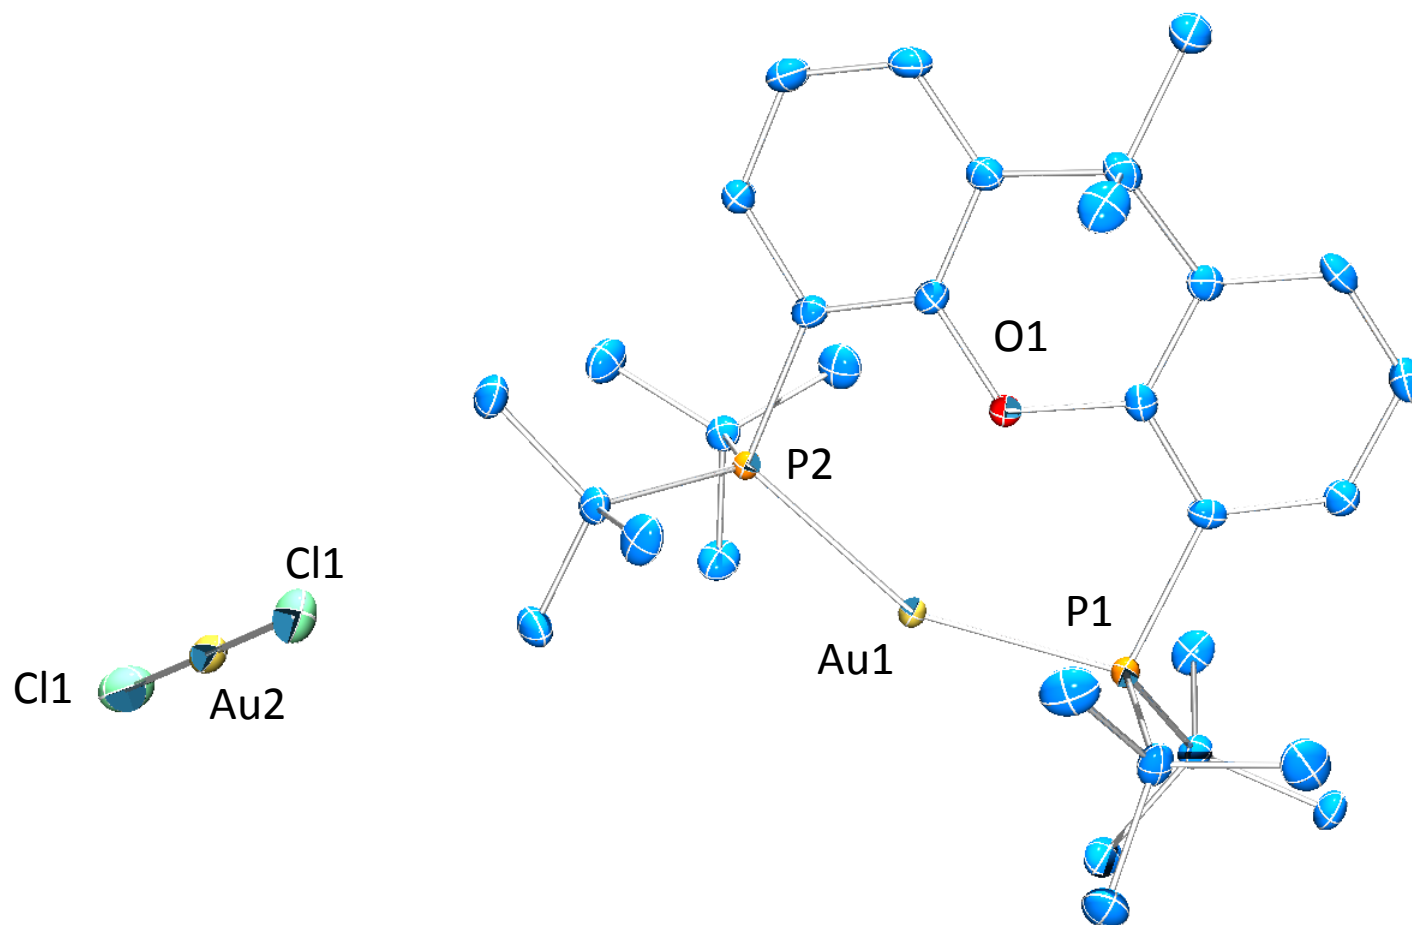

**Figure S2.** Thermal Ellipsoid Projection of **9** (50% probability).  
Unlabeled atoms are carbon; H atoms are omitted for clarity.

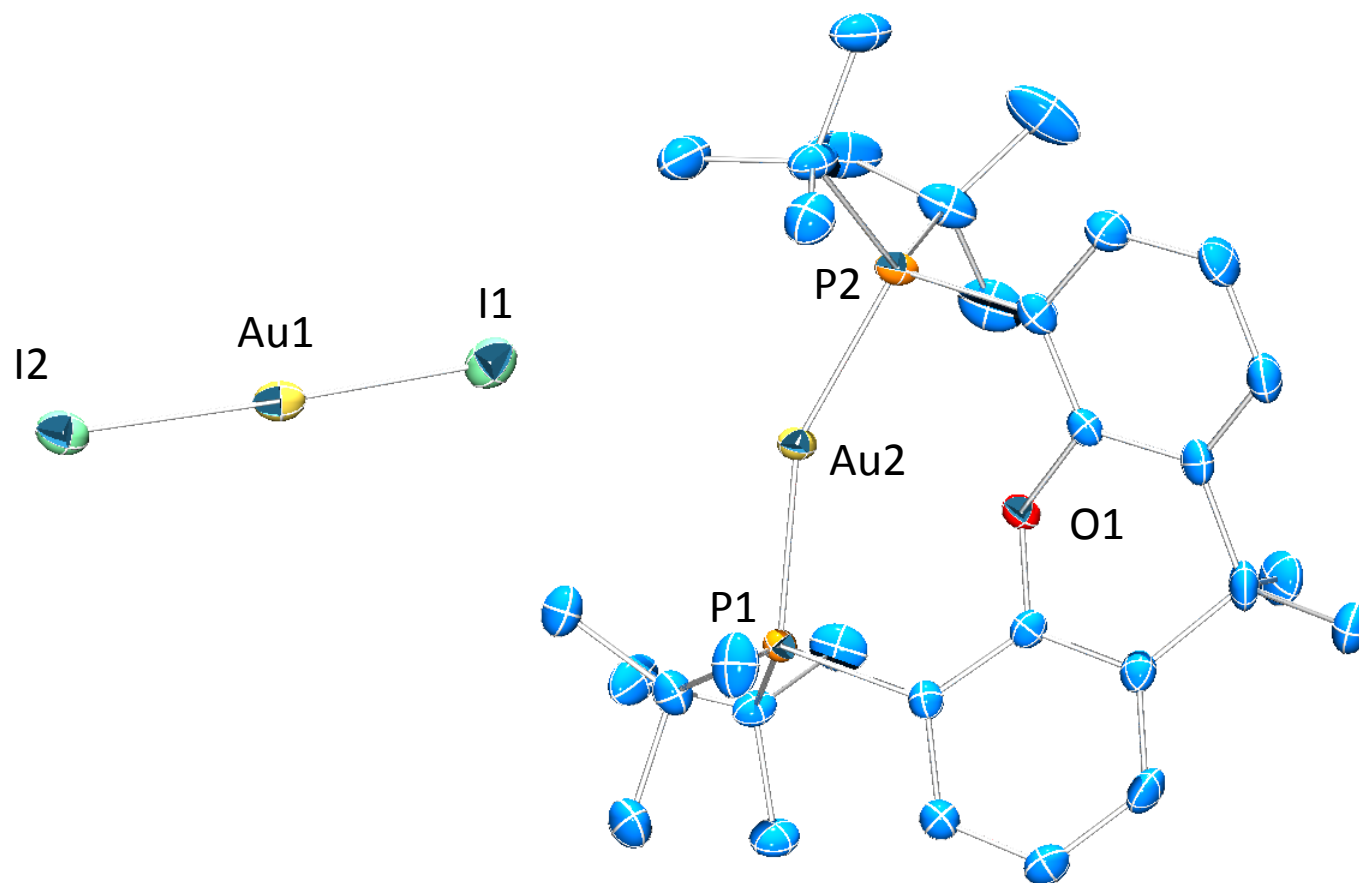

Supplement: b920717a.pdf [file b920717a.pdf]
